# Supplementary material for: Feasibility and efficacy of mass testing for SARS-CoV-2 in a UK university using swab pooling and PCR
Source: Research Square preprint supplement (doi:10.21203/rs.3.rs-520626/v1), 2021-05-20

Extended Data Fig. 1: Impact of communications on study participation.

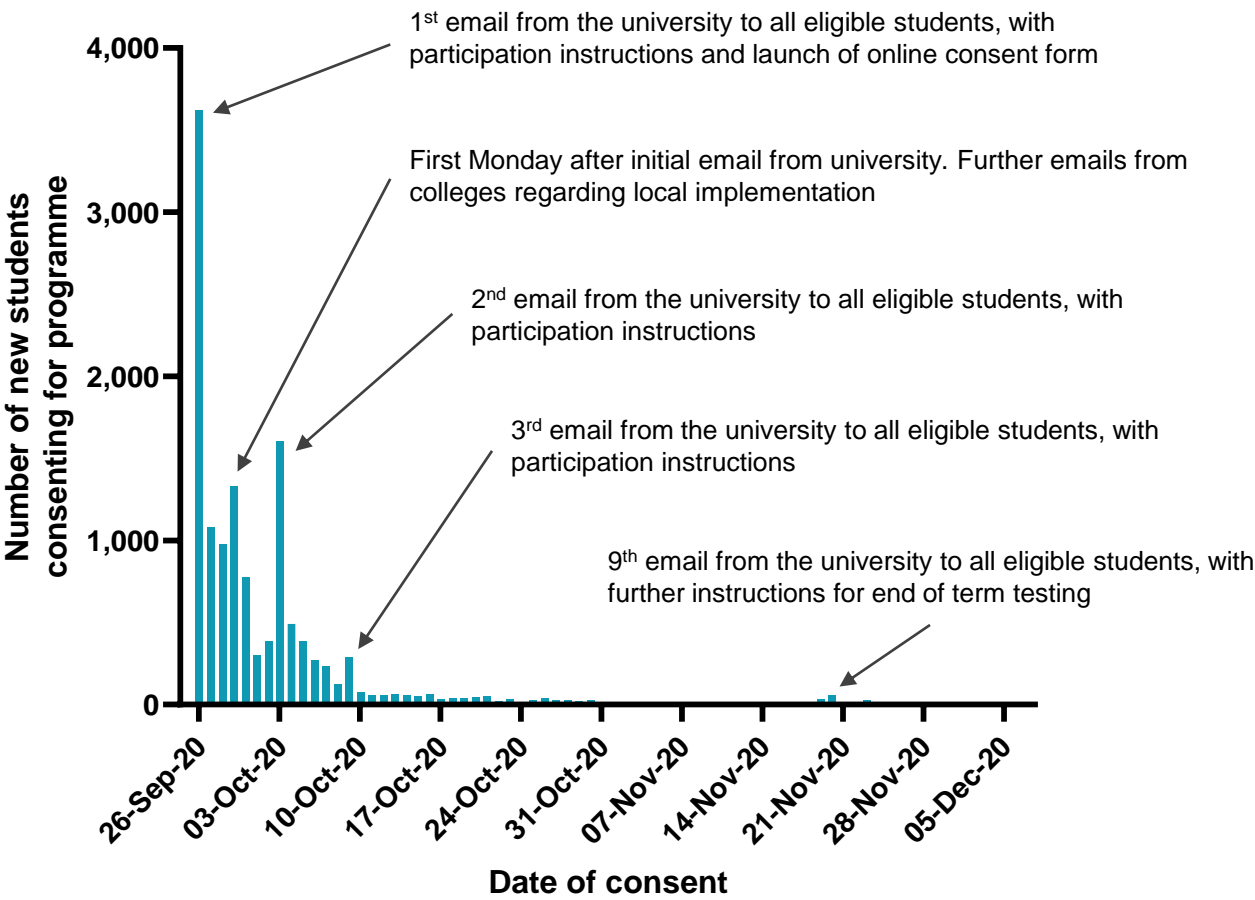

# Extended Data Fig. 2: Technical validation of swab pooling.

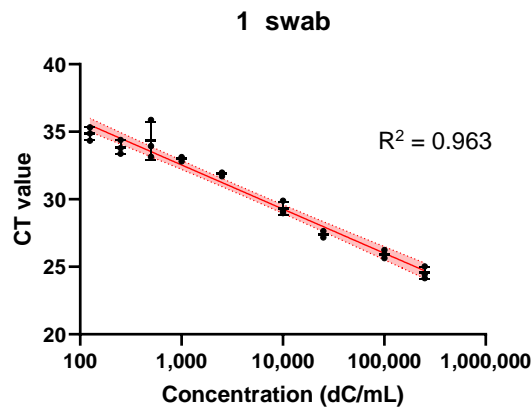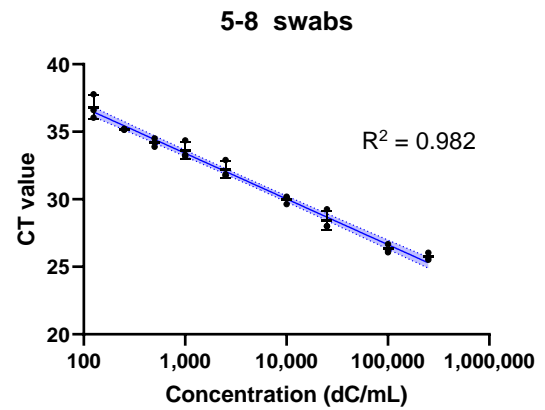

Extended Data Fig. 3: Symptoms identified by telephone survey.

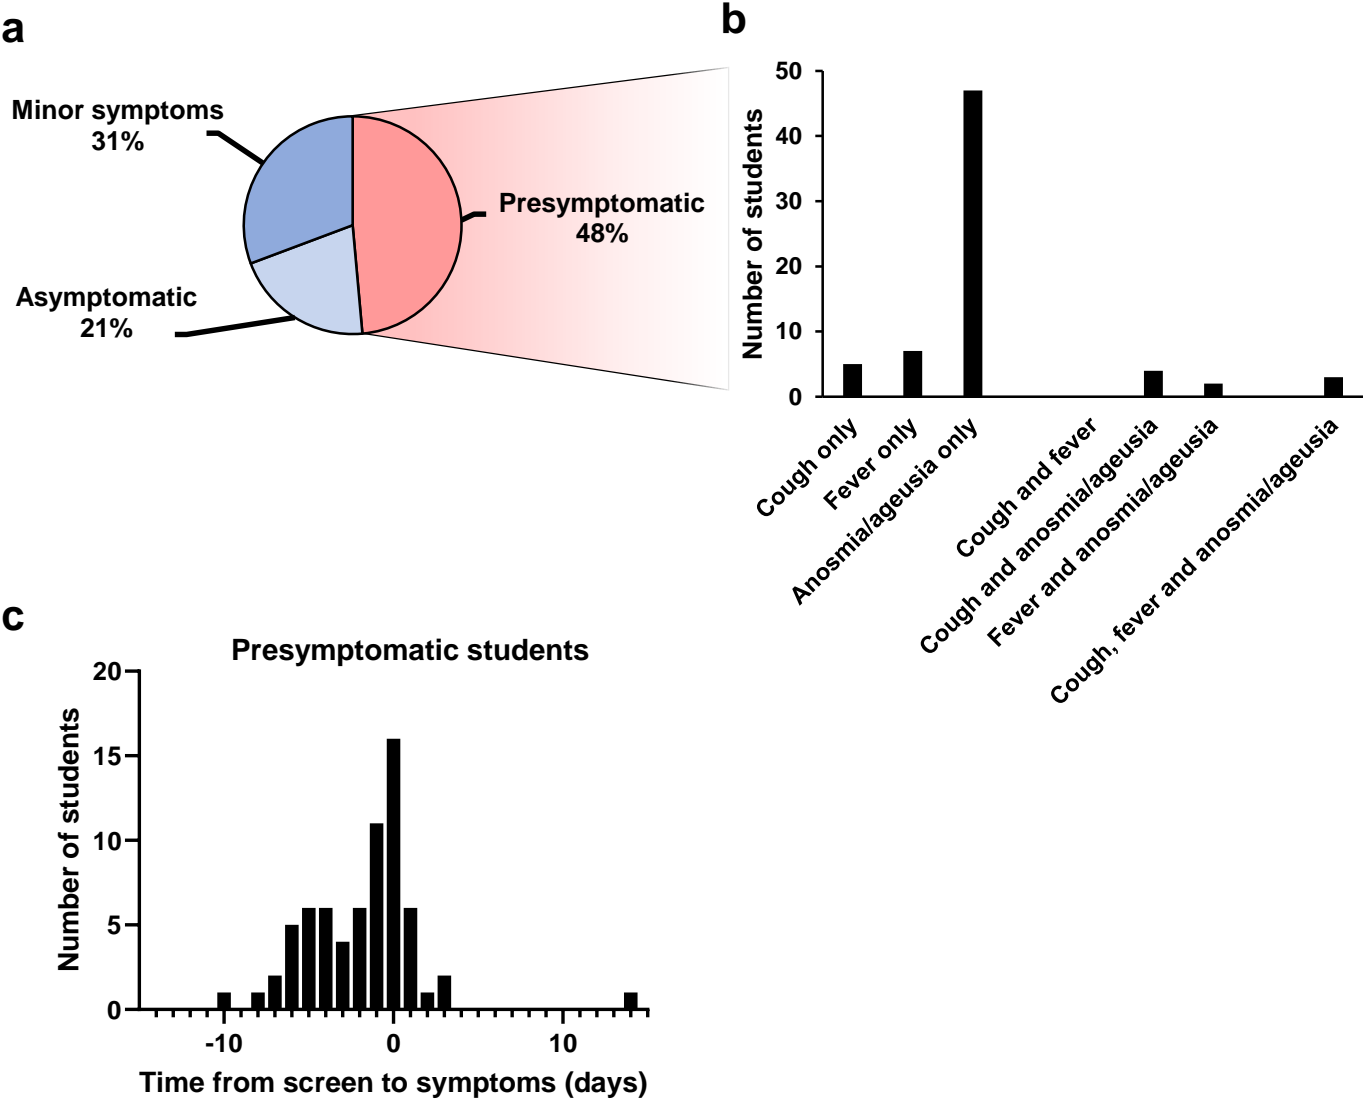

Extended Data Fig. 4: Comparison of CT values by testing pathway and symptoms.

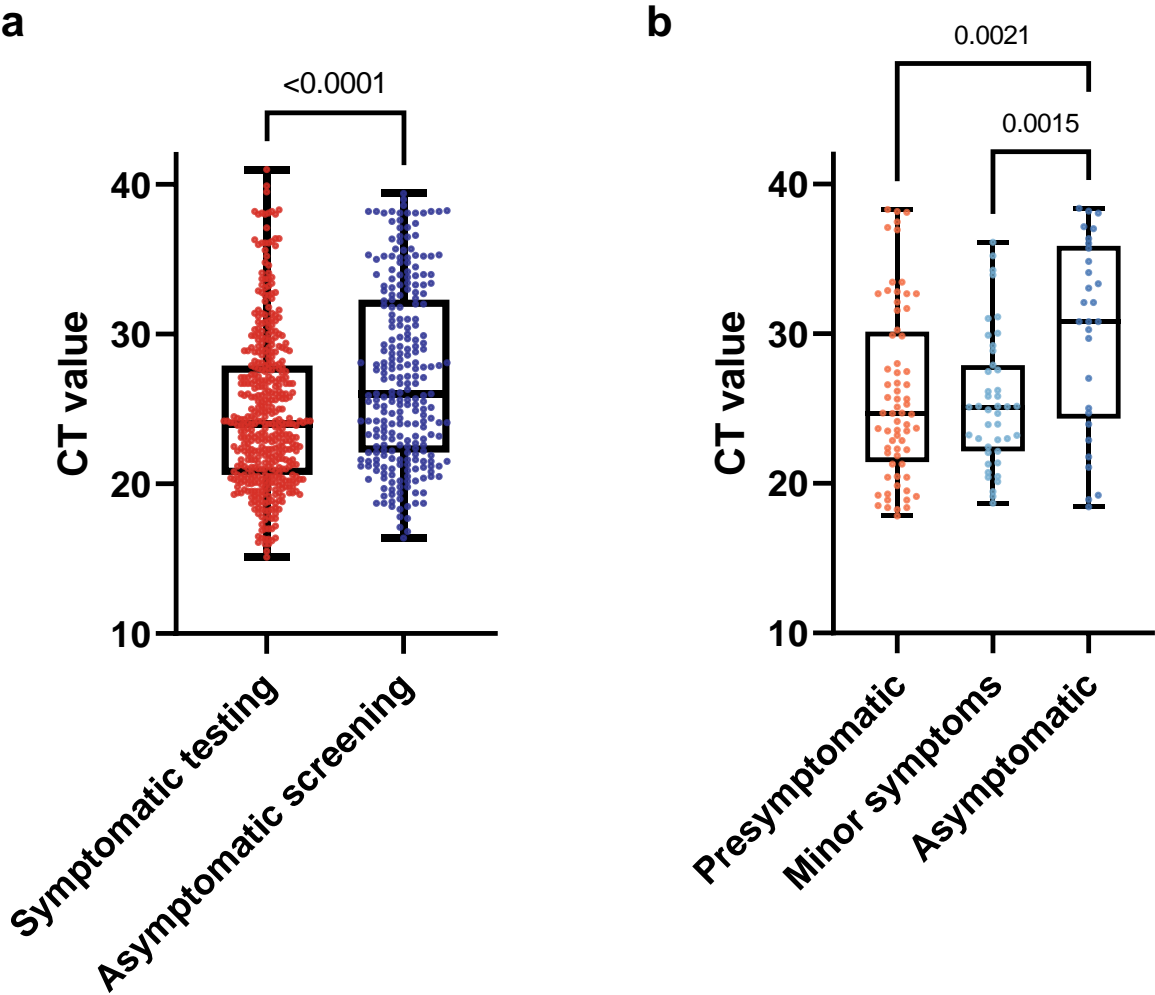

# Extended Data Fig. 5: Secondary household attack rates.

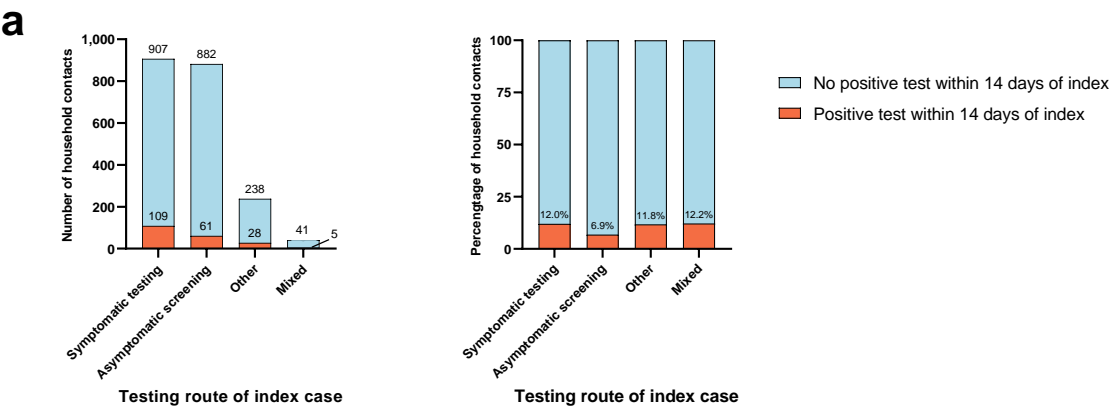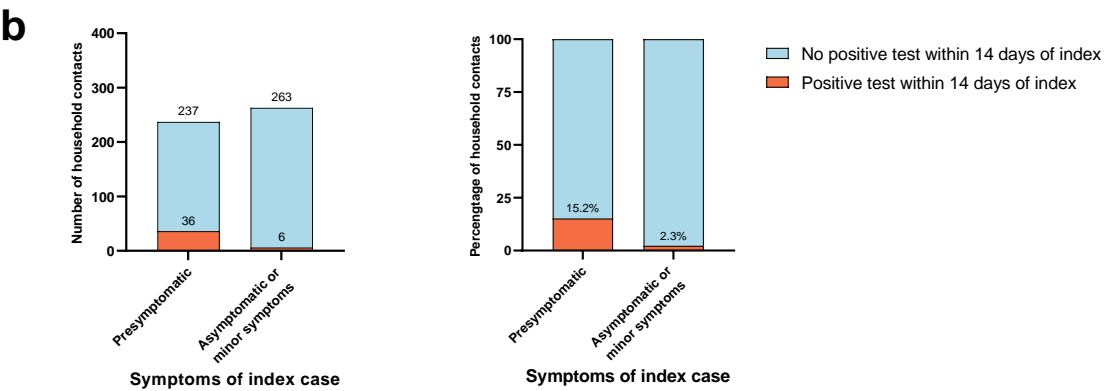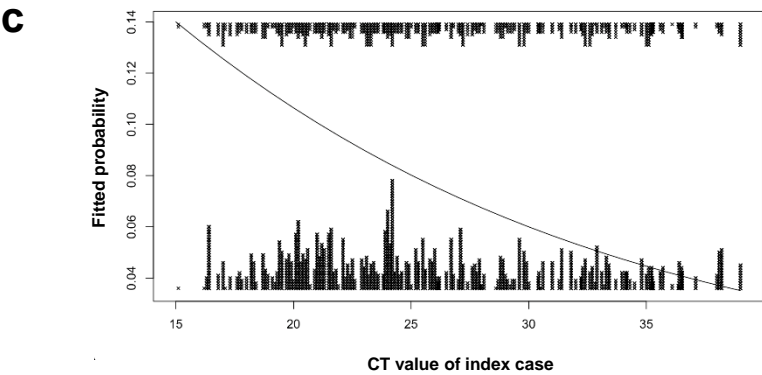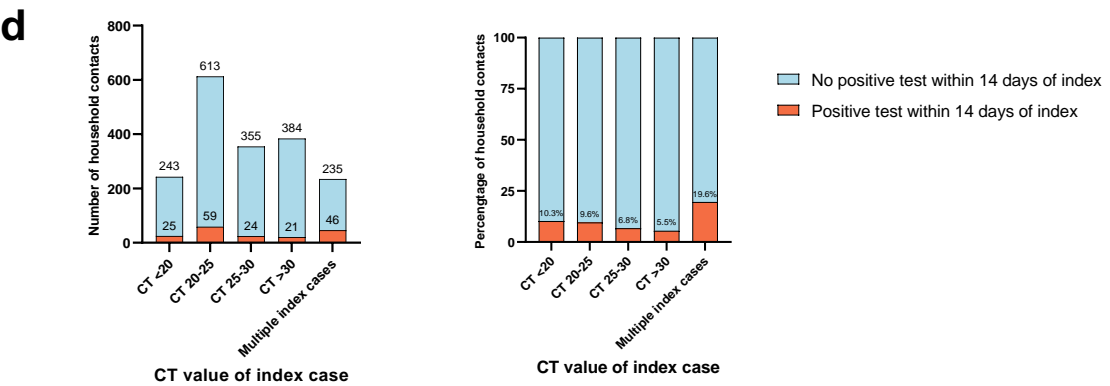

# Extended Data Fig. 6: Sensitivity analyses.

a: Number of non-household activity groups

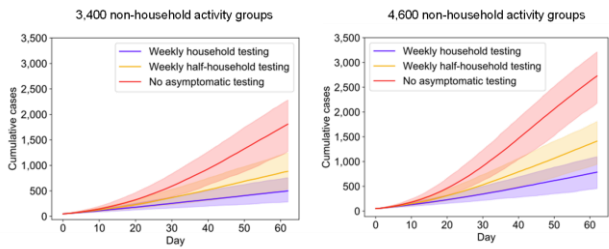

e: Mean presymptomatic infectious period

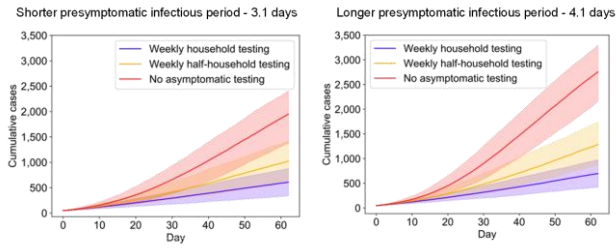

b: Proportion symptomatic

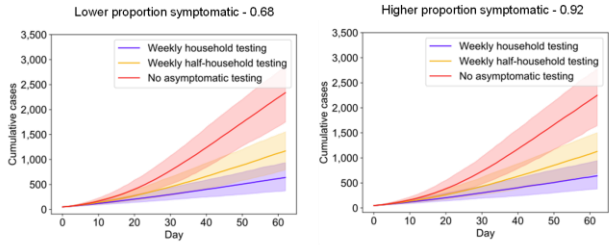

f: Mean infectious period after symptoms develop

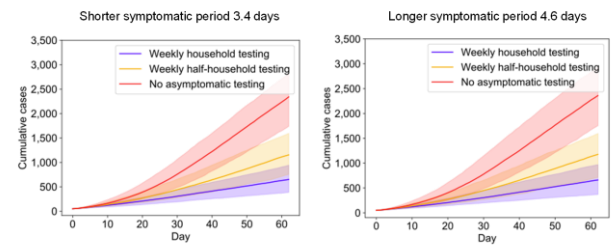

c: Probability of transmission for a household contact per day

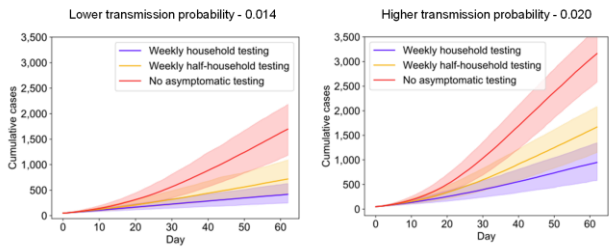

g: Ratio of infectiousness of asymptomatics (compared to symptomatics)

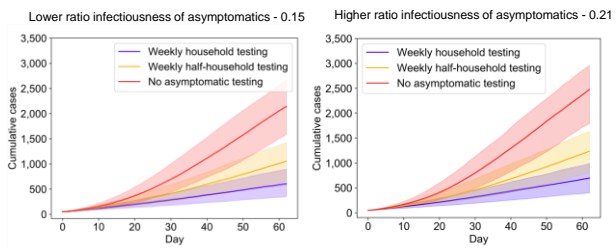

d: Ratio of probability of transmission for a non-household contact per day to probability of transmission for a household contact per day

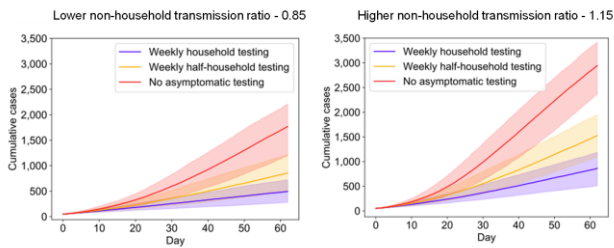

Supplement: Supplementary file 1 [file 0973c2ab1a1c4b1bd1997f7c.pdf]
