# Supplementary material for: Feasibility and efficacy of mass testing for SARS-CoV-2 in a UK university using swab pooling and PCR
Source: Research Square preprint supplement (doi:10.21203/rs.3.rs-520626/v1), 2021-05-20
Supplement: Supplementary file 2 [file be0cb5a5ad0de0cd524c5cb1.pdf]

## Supplementary tables

**Supplementary Table 1. Characteristics of study population.**

|                                        |                                      | Eligible                    | Participating               | Not-participating           | P value |
|----------------------------------------|--------------------------------------|-----------------------------|-----------------------------|-----------------------------|---------|
| <b>N</b>                               |                                      | 15,561                      | 12,781                      | 2,780                       |         |
| <b>Sex</b>                             | Male                                 | 8,060 (51.8%)               | 6,504 (50.9%)               | 1,556 (56.0%)               | <0.001  |
|                                        | Female                               | 7,213 (46.4%)               | 6,125 (47.9%)               | 1,088 (39.1%)               |         |
|                                        | Other/unknown                        | 288 (1.9%)                  | 152 (1.2%)                  | 136 (4.9%)                  |         |
| <b>Age, years, median (IQR, range)</b> |                                      | 20.6 (19.4-22.6, 16.4-71.7) | 20.5 (19.3-22.3, 16.4-58.1) | 21.3 (19.8-24.3, 17.4-71.7) | <0.001  |
| <b>Ethnicity</b>                       | White                                | 9,453 (60.7%)               | 8,168 (63.9%)               | 1,285 (46.2%)               | <0.001  |
|                                        | Black, Asian and minority ethnic     | 5,302 (34.1%)               | 4,097 (32.1%)               | 1,205 (43.3%)               |         |
|                                        | Refused/unknown                      | 806 (5.2%)                  | 516 (4.0%)                  | 290 (10.4%)                 |         |
| <b>Residency</b>                       | UK                                   | 9,870 (63.4%)               | 8,504 (66.5%)               | 1,366 (49.1%)               | <0.001  |
|                                        | International                        | 5,496 (35.3%)               | 4,205 (32.9%)               | 1,291 (46.4%)               |         |
|                                        | Unknown                              | 195 (1.3%)                  | 72 (0.6%)                   | 123 (4.4%)                  |         |
| <b>Year of study</b>                   | 1 <sup>st</sup>                      | 3,788 (24.3%)               | 3,336 (26.1%)               | 452 (5.5%)                  | <0.001  |
|                                        | 2 <sup>nd</sup>                      | 3,239 (20.8%)               | 2,673 (20.9%)               | 566 (20.4%)                 |         |
|                                        | 3 <sup>rd</sup>                      | 2,832 (18.2%)               | 2,434 (19.0%)               | 398 (14.3%)                 |         |
|                                        | 4 <sup>th</sup> (or above)           | 997 (6.4%)                  | 844 (6.6%)                  | 153 (5.5%)                  |         |
|                                        | Postgraduate                         | 4,369 (28.1%)               | 3,366 (26.3%)               | 1,003 (36.0%)               |         |
|                                        | Missing                              | 336 (2.2%)                  | 126 (1.0%)                  | 210 (7.5%)                  |         |
| <b>Stage</b>                           | Undergraduate                        | 10,857 (69.8%)              | 9,288 (72.7%)               | 1,569 (56.4%)               | <0.001  |
|                                        | Postgraduate                         | 4,369 (28.1%)               | 3,368 (26.3%)               | 1,001 (36.0%)               |         |
|                                        | Missing                              | 335 (2.2%)                  | 125 (1.0%)                  | 210 (7.5%)                  |         |
| <b>Course*</b>                         | Undergraduate arts and humanities    | 5,490 (35.3%)               | 4,553 (35.6%)               | 937 (33.7%)                 | <0.001  |
|                                        | Undergraduate science and technology | 5,454 (35.1%)               | 4,806 (37.6%)               | 648 (23.3%)                 |         |
|                                        | Postgraduate vocational              | 466 (3.0%)                  | 343 (2.7%)                  | 123 (4.4%)                  |         |
|                                        | Postgraduate (other)                 | 3,815 (24.5%)               | 2,953 (23.1%)               | 862 (31.0%)                 |         |
|                                        | Unknown                              | 336 (2.2%)                  | 126 (1.0%)                  | 210 (7.6%)                  |         |
| <b>Household size</b>                  | 1 person                             | 472 (3.0%)                  | 299 (2.3%)                  | 173 (6.2%)                  | <0.001  |
|                                        | 2 to 5 people                        | 4,535 (29.1%)               | 3,703 (29.0%)               | 832 (29.9%)                 |         |
|                                        | 6 to 10 people                       | 9,228 (59.3%)               | 7,688 (60.2%)               | 1,540 (55.4%)               |         |
|                                        | >10 people                           | 1,326 (8.5%)                | 1,091 (8.5%)                | 235 (8.5%)                  |         |

Student characteristics associated with programme participation were assessed by comparing participating and non-participating students using unpaired 2 sample 2 tailed *t*-tests (continuous variables) or chi-square tests (categorical variables).

\*Courses are grouped as: undergraduate arts and humanities (undergraduate students in the School of Arts and Humanities and the School of Humanities and Social Sciences); undergraduate science and technology (undergraduate students in the School of Biological Sciences, the School of Physical Sciences and the School of Technology); postgraduate vocational courses (students in clinical medicine, clinical veterinary medicine and postgraduate certificates in education); and other postgraduate courses (all other postgraduate students, including those in doctoral and masters programmes).

**Supplementary Table 2. Tests conducted.**

| Week             | Dates                | Eligible students | Participating students | Asymptomatic screening programme |               |                     |                          |                               |                               |               |                                   | University symptomatic testing |               |
|------------------|----------------------|-------------------|------------------------|----------------------------------|---------------|---------------------|--------------------------|-------------------------------|-------------------------------|---------------|-----------------------------------|--------------------------------|---------------|
|                  |                      |                   |                        | Screening tests                  | Valid results | Scale*              | Mean swab count per pool | Students screened (estimated) | Individual confirmatory tests | Valid results | Students screened per total tests | Individual tests               | Valid results |
| <b>1</b>         | 5 Oct – 11 Oct       | 15,479            | 11,638                 | 1,867                            | 1,837         | 2 students per pool | 1.87                     | 3,435                         | 36                            | 34            | 1.81                              | 102                            | 96            |
| <b>2</b>         | 12 Oct – 18 Oct      | 15,511            | 12,100                 | 1,890                            | 1,866         | 2 students per pool | 1.92                     | 3,583                         | 56                            | 56            | 1.84                              | 221                            | 219           |
| <b>3</b>         | 19 Oct – 25 Oct      | 15,488            | 12,195                 | 1,913                            | 1,886         | Half-pool           | 2.47                     | 4,658                         | 105                           | 104           | 2.31                              | 195                            | 194           |
| <b>4</b>         | 26 Oct – 1 Nov       | 15,440            | 12,383                 | 1,923                            | 1,900         | Half-pool           | 2.92                     | 5,548                         | 109                           | 109           | 2.73                              | 109                            | 109           |
| <b>5</b>         | 2 Nov – 8 Nov        | 15,385            | 12,372                 | 1,873                            | 1,865         | Half-pool           | 2.49                     | 4,644                         | 79                            | 77            | 2.38                              | 112                            | 110           |
| <b>6</b>         | 9 Nov – 15 Nov       | 15,323            | 12,350                 | 1,864                            | 1,851         | Half-pool           | 2.89                     | 5,349                         | 228                           | 226           | 2.56                              | 265                            | 263           |
| <b>7</b>         | 16 Nov – 22 Nov      | 15,307            | 12,424                 | 1,743                            | 1,727         | Half-pool           | 2.42                     | 4,179                         | 102                           | 102           | 2.27                              | 87                             | 87            |
| <b>8</b>         | 23 Nov – 29 Nov      | 15,309            | 12,498                 | 1,919                            | 1,889         | Whole pool          | 5.02                     | 9,483                         | 45                            | 44            | 4.83                              | 28                             | 28            |
| <b>9</b>         | 30 Nov – 6 Dec       | 15,310            | 12,544                 | 1,953                            | 1,938         | Whole pool          | 4.90                     | 9,496                         | 52                            | 52            | 4.74                              | 27                             | 27            |
| <b>Weeks 1-2</b> | 5 Oct – 18 Oct       |                   |                        | 3,757                            | 3,703         | 2 students per pool |                          | 7,018                         | 92                            | 90            | 1.82                              | 323                            | 315           |
| <b>Weeks 3-7</b> | 19 Oct – 22 Nov      |                   |                        | 9,316                            | 9,229         | Half-pool           |                          | 24,379                        | 623                           | 618           | 2.45                              | 768                            | 763           |
| <b>Weeks 8-9</b> | 23 Nov – 6 Dec       |                   |                        | 3,872                            | 3,827         | Whole pool          |                          | 18,979                        | 97                            | 96            | 4.78                              | 55                             | 55            |
| <b>All weeks</b> | <b>5 Oct – 6 Dec</b> | <b>15,561</b>     | <b>12,979</b>          | <b>16,945</b>                    | <b>16,759</b> |                     |                          | <b>50,376</b>                 | <b>812</b>                    | <b>804</b>    | <b>2.84</b>                       | <b>1,146</b>                   | <b>1,133</b>  |

\*Phase 1 (weeks 1-2): two students per testing pool screened each week; phase 2 (weeks 3-7): half of each testing pool screened on alternating week; phase 3 (weeks 8-9): whole testing pool screened each week.

**Supplementary Table 3. Case ascertainment.**

| Week      | Dates           | Asymptomatic screening programme |                                                                  |                           |                                                           |        |                                                                |        | University symptomatic testing | Other* | Total positive individual tests | % ascertained through screening |
|-----------|-----------------|----------------------------------|------------------------------------------------------------------|---------------------------|-----------------------------------------------------------|--------|----------------------------------------------------------------|--------|--------------------------------|--------|---------------------------------|---------------------------------|
|           |                 | Positive pooled screening tests  | Confirmed positive pools (at least one positive individual test) | Positive individual tests | Positive individual tests per positive pool (mean, range) |        | Positive individual tests per positive household (mean, range) |        | Positive tests                 |        |                                 |                                 |
| 1         | 5 Oct – 11 Oct  | 19                               | 11                                                               | 12                        | 1.1                                                       | 1 to 2 | 1.1                                                            | 1 to 2 | 6                              | 2      | 20                              | 60.0%                           |
| 2         | 12 Oct – 18 Oct | 28                               | 27                                                               | 35                        | 1.3                                                       | 1 to 2 | 1.2                                                            | 1 to 2 | 79                             | 8      | 122                             | 28.7%                           |
| 3         | 19 Oct – 25 Oct | 38                               | 36                                                               | 38                        | 1.1                                                       | 1 to 2 | 1.2                                                            | 1 to 3 | 50                             | 12     | 100                             | 38.0%                           |
| 4         | 26 Oct – 1 Nov  | 35                               | 30                                                               | 38                        | 1.3                                                       | 1 to 3 | 1.3                                                            | 1 to 3 | 21                             | 7      | 66                              | 57.6%                           |
| 5         | 2 Nov – 8 Nov   | 26                               | 22                                                               | 23                        | 1.1                                                       | 1 to 2 | 1.1                                                            | 1 to 2 | 37                             | 17     | 76                              | 28.9%                           |
| 6         | 9 Nov – 15 Nov  | 67                               | 59                                                               | 80                        | 1.4                                                       | 1 to 4 | 1.4                                                            | 1 to 4 | 122                            | 26     | 228                             | 35.1%                           |
| 7         | 16 Nov – 22 Nov | 22                               | 17                                                               | 27                        | 1.6                                                       | 1 to 4 | 1.6                                                            | 1 to 4 | 15                             | 6      | 48                              | 56.3%                           |
| 8         | 23 Nov – 29 Nov | 7                                | 3                                                                | 3                         | 1.0                                                       | 1      | 1.0                                                            | 1      | 1                              | 0      | 4                               | 75.0%                           |
| 9         | 30 Nov – 6 Dec  | 10                               | 0                                                                | 0                         | -                                                         | -      | -                                                              | -      | 4                              | 2      | 6                               | 0.0%                            |
| Weeks 1-2 | 5 Oct – 18 Oct  | 47                               | 38                                                               | 47                        | 1.2                                                       | 1 to 2 | 1.2                                                            | 1 to 2 | 85                             | 10     | 142                             | 33.1%                           |
| Weeks 3-7 | 19 Oct – 22 Nov | 188                              | 164                                                              | 206                       | 1.3                                                       | 1 to 4 | 1.3                                                            | 1 to 4 | 245                            | 68     | 519                             | 39.7%                           |
| Weeks 8-9 | 23 Nov – 6 Dec  | 17                               | 3                                                                | 3                         | 1.0                                                       | 1      | 1.0                                                            | 1      | 5                              | 2      | 10                              | 30.0%                           |
| All weeks | 5 Oct – 6 Dec   | 252                              | 205                                                              | 256                       | 1.3                                                       | 1 to 4 | 1.3                                                            | 1 to 4 | 335                            | 80     | 671                             | 38.2%                           |

\*Other includes: positive results obtained through other testing pathways, such as NHS testing facilities, and reported to the university by Public Health England; and 7 asymptomatic positive cases identified through a distinct programme of screening undertaken by the university in conjunction with local public health teams during an outbreak investigation in a single accommodation block during term week 3. An additional 2 cases reported to the university by Public Health England during the study period were excluded, because their test dates could not be confirmed.

**Supplementary Table 4. Technical validation: number of replicates detected for each target concentration of SARS-CoV-2 virus.**

| Target concentration of SARS CoV-2 (dC/mL) | Calculated SARS Cov-2 copies per RT-PCR reaction | Number of swabs | Replicates detected | Number of swabs | Replicates detected |
|--------------------------------------------|--------------------------------------------------|-----------------|---------------------|-----------------|---------------------|
| 250,000                                    | 4,444                                            | 1               | 3/3                 | 5-6             | 3/3                 |
| 100,000                                    | 1,778                                            | 1               | 3/3                 | 5-7             | 3/3                 |
| 25,000                                     | 444                                              | 1               | 2/2                 | 5-6             | 3/3                 |
| 10,000                                     | 178                                              | 1               | 3/3                 | 5-6             | 3/3                 |
| 2,500                                      | 44                                               | 1               | 3/3                 | 5-6             | 3/3                 |
| 1,000                                      | 18                                               | 1               | 3/3                 | 5-7             | 3/3                 |
| 500                                        | 9                                                | 1               | 3/3                 | 5-6             | 3/3                 |
| 250                                        | 4                                                | 1               | 3/3                 | 5-8             | 3/3                 |
| 125                                        | 2                                                | 1               | 3/3                 | 5-7             | 3/3                 |

**Supplementary Table 5. Distribution of CT values for individual confirmatory tests.**

|                                              | CT value |           |          |          |          |            |
|----------------------------------------------|----------|-----------|----------|----------|----------|------------|
|                                              | <20      | 20-25     | 25-30    | 30-35    | ≥35      | All        |
| <b>Symptomatic testing</b>                   | 60 (18%) | 137 (41%) | 83 (25%) | 41 (12%) | 14 (4%)  | 335 (100%) |
| <b>Asymptomatic screening programme</b>      | 23 (9%)  | 85 (33%)  | 68 (27%) | 43 (17%) | 37 (14%) | 256 (100%) |
| <b>Presymptomatic with cardinal symptoms</b> | 6 (9%)   | 30 (44%)  | 21 (31%) | 7 (10%)  | 6 (9%)   | 68 (100%)  |
| <b>Minor symptoms</b>                        | 4 (9%)   | 14 (33%)  | 17 (40%) | 3 (7%)   | 5 (12%)  | 43 (100%)  |
| <b>Asymptomatic</b>                          | 2 (7%)   | 6 (21%)   | 4 (14%)  | 7 (24%)  | 10 (34%) | 29 (100%)  |

**Supplementary Table 6. Single variable logistic regression analysis of student characteristics associated with a positive SARS-CoV-2 result, n=12,781.**

| Variable              | Category                             | Positive | Not positive | OR   | (95% CI)    | P value |
|-----------------------|--------------------------------------|----------|--------------|------|-------------|---------|
| <b>Sex</b>            | Female                               | 325      | 5,800        |      |             |         |
|                       | Male                                 | 346      | 6,158        | 1.00 | 0.86-1.17   | 0.97    |
|                       | Other/unknown                        | 5        | 147          | 0.61 | 0.21-1.34   | 0.28    |
| <b>Ethnicity</b>      | White                                | 509      | 7,659        |      |             |         |
|                       | Other                                | 153      | 3,944        | 0.58 | 0.48-0.70   | <0.001  |
|                       | Unknown                              | 14       | 502          | 0.42 | 0.23-0.69   | 0.002   |
| <b>Residency</b>      | UK                                   | 570      | 7,934        |      |             |         |
|                       | International                        | 103      | 4,102        | 0.35 | 0.28-0.43   | <0.001  |
|                       | Unknown                              | 3        | 69           | 0.61 | 0.15-1.63   | 0.40    |
| <b>Year of study</b>  | 1 <sup>st</sup>                      | 367      | 5,195        |      |             |         |
|                       | 2 <sup>nd</sup>                      | 166      | 2,999        | 0.78 | 0.65-0.95   | 0.01    |
|                       | 3 <sup>rd</sup> or higher            | 142      | 3,786        | 0.53 | 0.43-0.65   | <0.001  |
|                       | Unknown                              | 1        | 125          | 0.11 | 0.006-0.51  | 0.03    |
| <b>Course</b>         | Undergraduate arts and humanities    | 348      | 4,205        |      |             |         |
|                       | Undergraduate science and technology | 246      | 4,560        | 0.65 | 0.55-0.77   | <0.001  |
|                       | Postgraduate vocational              | 22       | 321          | 0.83 | 0.52-1.26   | 0.41    |
|                       | Postgraduate (other)                 | 59       | 2,894        | 0.25 | 0.18-0.32   | <0.001  |
|                       | Unknown                              | 1        | 125          | 0.10 | 0.0055-0.43 | 0.02    |
| <b>Household size</b> | Minimum                              | 1        | 1            | 1.08 | 1.05-1.11   | <0.001  |
|                       | 25 <sup>th</sup> centile             | 6        | 5            |      |             |         |
|                       | Median                               | 7        | 7            |      |             |         |
|                       | 75 <sup>th</sup> centile             | 8        | 8            |      |             |         |
|                       | Maximum                              | 20       | 20           |      |             |         |

**Supplementary Table 7. Multivariable logistic regression analysis of student characteristics associated with a positive SARS-CoV-2 result, n=12,781.**

| Variable              | Category                             | OR   | 95% CI     | P value |
|-----------------------|--------------------------------------|------|------------|---------|
| <b>Sex</b>            | Female                               |      |            |         |
|                       | Male                                 | 1.21 | 1.03-1.42  | 0.02    |
|                       | Other/unknown                        | 0.44 | 0.07-1.42  | 0.26    |
| <b>Ethnicity</b>      | White                                |      |            |         |
|                       | Other                                | 0.69 | 0.57-0.84  | <0.001  |
|                       | Unknown                              | 0.46 | 0.23-0.81  | 0.01    |
| <b>Residency</b>      | UK                                   |      |            |         |
|                       | International                        | 0.53 | 0.42-0.67  | <0.01   |
|                       | Unknown                              | 12.4 | 1.63-113   | 0.01    |
| <b>Year of study</b>  | 1 <sup>st</sup>                      |      |            |         |
|                       | 2 <sup>nd</sup>                      | 0.63 | 0.52-0.76  | <0.001  |
|                       | 3 <sup>rd</sup> or higher            | 0.44 | 0.36-0.54  | <0.001  |
|                       | Unknown                              | 0.04 | 0.002-0.24 | 0.004   |
| <b>Course</b>         | Undergraduate arts and humanities    |      |            |         |
|                       | Undergraduate science and technology | 0.74 | 0.62-0.88  | 0.001   |
|                       | Postgraduate vocational              | 0.73 | 0.45-1.11  | 0.16    |
|                       | Postgraduate (other)                 | 0.28 | 0.21-0.38  | <0.001  |
|                       | Unknown                              | NA   | -          | -       |
| <b>Household size</b> |                                      | 1.06 | 1.03-1.09  | <0.001  |

**Supplementary Table 8: Model settings, parameters, and assumptions.**

| Parameter or setting                                                                                                                           | Value or assumption                                                                                                                                                                                                                                                          | Source                                                                                                                                                                                                                                                                                                                                                                                                                                                                                                                | Change from HE-INI model <sup>1</sup>                                       |
|------------------------------------------------------------------------------------------------------------------------------------------------|------------------------------------------------------------------------------------------------------------------------------------------------------------------------------------------------------------------------------------------------------------------------------|-----------------------------------------------------------------------------------------------------------------------------------------------------------------------------------------------------------------------------------------------------------------------------------------------------------------------------------------------------------------------------------------------------------------------------------------------------------------------------------------------------------------------|-----------------------------------------------------------------------------|
| <b>Network settings</b>                                                                                                                        |                                                                                                                                                                                                                                                                              |                                                                                                                                                                                                                                                                                                                                                                                                                                                                                                                       |                                                                             |
| <b>Number of individuals</b>                                                                                                                   | 12,781                                                                                                                                                                                                                                                                       | From data: number of study participants                                                                                                                                                                                                                                                                                                                                                                                                                                                                               | Yes – generic 15,000 used in preprint                                       |
| <b>Household structure</b>                                                                                                                     | Full specification:<br>{1: 0.151, 2:0.105, 3:0.074, 4:0.114, 5:0.115, 6:0.130, 7:0.094, 8:0.117, 9:0.036, 10:0.029, 11:0.014, 12:0.012, 13:0.003, 14:0.003, 15:0.001, 16: 0.001, 18:0.001}<br><br>This notation means:<br>Size_of_household:fraction_of_households_that_size | From data: household structure of eligible students                                                                                                                                                                                                                                                                                                                                                                                                                                                                   | Yes – {10: 0.5, 5: 0.5} used in preprint, arbitrary choice                  |
| <b>Sizes of other activity groups</b>                                                                                                          | Full specification:<br>{50:0.01, 10:0.5, 5:0.49}<br><br>Notation as above                                                                                                                                                                                                    | By assumption: to model a majority of small groups, with a small number of larger events                                                                                                                                                                                                                                                                                                                                                                                                                              | Yes - {40: 0.05, 10:0.3, 5:0.5, 3: 0.15} used in preprint, arbitrary choice |
| <b>Number of other activity groups</b>                                                                                                         | 4,000                                                                                                                                                                                                                                                                        | By assumption: note relationship to probability of transmission for a non-household contact below                                                                                                                                                                                                                                                                                                                                                                                                                     | Yes – 3,000 used in preprint, arbitrary choice                              |
| <b>Disease progression and transmission</b>                                                                                                    |                                                                                                                                                                                                                                                                              |                                                                                                                                                                                                                                                                                                                                                                                                                                                                                                                       |                                                                             |
| <b>Probability of transmission for a household contact per day</b>                                                                             | 0.017                                                                                                                                                                                                                                                                        | From data: calibrated to produce the observed within-household attack rate, accounting for symptomatic and asymptomatic infections                                                                                                                                                                                                                                                                                                                                                                                    | Yes – 0.025 used in preprint, chosen for plausibility                       |
| <b>Ratio of probability of transmission for a non-household contact per day to probability of transmission for a household contact per day</b> | 1.0                                                                                                                                                                                                                                                                          | From data: calibrated to produce a between-household attack rate roughly consistent with the observed rate to week 7 (before the UK national lockdown)<br><br>Note that this parameter has a relationship to the sizes and number of other activity groups: an increase in the number of other activity groups or their sizes gives similar results to an increase in this parameter<br><br>For computational reasons it is more efficient to increase this parameter than the total number of non-household contacts | Yes – 0.2 used in preprint, chosen for plausibility                         |
| <b>Mean non-infectious latent period</b>                                                                                                       | 2.9 days                                                                                                                                                                                                                                                                     | Alene <i>et al.</i> (2021) <sup>2</sup>                                                                                                                                                                                                                                                                                                                                                                                                                                                                               | Yes (small change) – 3 days in preprint, chosen for plausibility            |



|                                                                          |                                                                                                                                                                                         |                                                                                                            |                                                                      |
|--------------------------------------------------------------------------|-----------------------------------------------------------------------------------------------------------------------------------------------------------------------------------------|------------------------------------------------------------------------------------------------------------|----------------------------------------------------------------------|
| <b>Mean presymptomatic infectious period</b>                             | 3.6 days                                                                                                                                                                                | From data: observed presymptomatic infectious period                                                       | Yes – 2 days in preprint, chosen for plausibility                    |
| <b>Proportion asymptomatic</b>                                           | 19.7%                                                                                                                                                                                   | From data: observed proportion of asymptomatic students                                                    | Yes – 50%, chosen for plausibility                                   |
| <b>Infectiousness of presymptomatics relative to symptomatics</b>        | Equal                                                                                                                                                                                   | By assumption                                                                                              | No change                                                            |
| <b>Infectiousness of asymptomatics relative to symptomatics</b>          | 18%                                                                                                                                                                                     | From data: observed ratio of secondary household attack rates for asymptomatic and symptomatic index cases | Yes – equal infectiousness used in preprint, chosen for plausibility |
| <b>Mean infectious period after symptoms develop</b>                     | 4 days                                                                                                                                                                                  | Singanayagam, A. <i>et al.</i> (2020) <sup>3</sup>                                                         | Yes – 10 days used in preprint, chosen for plausibility              |
| <b>Total mean period of infectiousness of an asymptomatic individual</b> | Equal to symptomatic individual (mean 7.6 days)                                                                                                                                         | By assumption                                                                                              | No change                                                            |
| <b>Testing and isolation</b>                                             |                                                                                                                                                                                         |                                                                                                            |                                                                      |
| <b>Probability and speed of symptomatic tests</b>                        | Symptomatic individuals immediately seek tests with no false positives or false negatives. Positive tests result in household isolation from the following day                          | By assumption                                                                                              | No change                                                            |
| <b>Participation in asymptomatic screening</b>                           | 100%                                                                                                                                                                                    | By assumption                                                                                              | No change                                                            |
| <b>Performance of asymptomatic tests</b>                                 | Asymptomatic testing is perfect with no false negatives or false positives. Positive tests result in household isolation from the following day                                         | By assumption                                                                                              | No change                                                            |
| <b>Isolation</b>                                                         | Entire household isolates upon any positive test within the household                                                                                                                   | By assumption                                                                                              | No change                                                            |
| <b>Expected isolation period</b>                                         | 14 days                                                                                                                                                                                 | By assumption                                                                                              | No change                                                            |
| <b>Isolation implications for contact</b>                                | When a household isolates, all contacts between members of the household and non-members cease, but all contacts within the household continue as before including with the index case. | By assumption                                                                                              | No change                                                            |
| <b>Tracing</b>                                                           | 50% probability of each non-household contact of a test-positive being contacted and isolating from the day after the positive test.                                                    | By assumption                                                                                              | No change                                                            |

1. Enright, J. *et al.* SARS-CoV-2 infection in UK university students: Lessons from September-December 2020 and modelling insights for future student return. *INI Preprint Series* (2021). Available in preprint at: <https://www.newton.ac.uk/files/preprints/ni20004.pdf>.
2. Alene, M. *et al.* Serial interval and incubation period of COVID-19: a systematic review and meta-analysis. *BMC Infect Dis* **21**, 257, doi:10.1186/s12879-021-05950-x (2021).
3. Singanayagam, A. *et al.* Duration of infectiousness and correlation with RT-PCR cycle threshold values in cases of COVID-19, England, January to May 2020. *Euro Surveill* **25**, doi:10.2807/1560-7917.ES.2020.25.32.2001483 (2020).

# Supplementary notes

## University of Cambridge Asymptomatic COVID-19 Screening Programme Consortium

### Rapid Response Working Group to Test, Trace and Isolate

Patrick Maxwell, Nicholas Matheson, Chris Abell, Vickie Braithwaite, Craig Brierley, Jon Crowcroft, Aastha Dahal, Kathryn Faulkner, Michael Glover, Ian Goodfellow, Jane Greated, Jon Holgate, Rob Howes, Laura James, Paul Lehner, Ian Leslie, Kathleen Liddell, Ben Margolis, Duncan McFarlane, Sally Morgan, Linda Sheridan, Sally Valletta, Anna Vignoles, Martin Vinnell, Ben Warne, Michael Weekes, Mark Wills

### Clinical Research Nurse Team

Stewart Fuller, Marina Metaxaki, Sarah Hilborne, Sarah Berry, Mahin Bagheri Kahkeshi, Dawn Hancock, Jennifer Winster

### Biopharma RD, AstraZeneca, Cambridge

Rob Howes, Alexandra Orton, Julie Douthwaite, Steve Rees

### Charles River Laboratories, Chesterford Research Park, Saffron Walden, UK

Christopher Brown, Daniel R Jones, Fred Kuenzi, Jennifer Rankin, Ian Waddell

### Statistics/modelling

Jessica Enright, Richard Samworth

### University Information Services

Jon Holgate, Vijay Samtani, Gabriela Ahmadi-Assalemi, Tom Feather, Robin Goodall, Steve Hoensch, Dean Johnson, Martin Hunt, Nick Mathieson, Katya Nikitina, Zara Sheldrake

### Clinical School Computing Service

Martin Keen, Aris Sato, David Connor, Jonathan Tolhurst, Jack Williman

### Clinical School Information Governance Office

Victoria Hollamby

### COVID-19 Operations Centre, University of Cambridge

Gillian Weale, Sinead Jordan, Tania Fatseas, Peter Taylor, Christine Georgiou, Michelle Caspersz, Claire McNulty, Richard Davies

### Institute for Manufacturing, University of Cambridge

Duncan McFarlane, Rebecca Clarke, Darius Danaei, Rory Dyer, Rob Glew, Oliver Lambson

### Testing Kit Packing Team

Karen Gibbs, Barbara Mozdzen, Gabor Raub, Asako Radecki, Phil White, Robert Hughes, Lucie Gransden, Matt Ceaser

### Administrative Support

Robert Sing, Karl Wilson

### Operational Systems Support

Ajith Parlikad, Maharshi Dhada, Tom Ridgman

**University Messenger Service**

Diane Mungovan, Steve Matthews, Paul Searle, John Mills

**Collegiate University**

Andy Neely, Robert Henderson, Edna Murphy, Matthew Russell, Anthony Freeling, Steve Poppitt, Jo Tynan

**Data Protection and Information Compliance**

James Knapton, Filippo Marchetti

**COG-UK Cambridge**

Sharon Peacock, Ian Goodfellow, Ewan Harrison, Dinesh Aggarwal, Thomas Fieldman, Beth Blane, Yasmin Chaudhry, Daniela De Angelis, Theresa Feltwell, Iliana Georgana, Nazreen F. Hadjirin, Grant Hall, William Hamilton, Myra Hosmillo, Chris Illingworth, Aminu Jahun, Danielle Leek, Catherine Ludden, Malte Pinckert

**Cambridge University Hospitals NHS Foundation Trust**

Ashley Shaw, Afzal Chaudhry, Nicholas M Brown, Lenette Mactavous, Sophie Hannan, Aleksandra Hosaja, Clare Leong

**Occupational Health and Wellbeing (Cambridge University Hospitals NHS Foundation Trust)**

Jo Wright, Natalie Quinnell, Chris Workman, Mark Ferris, Giles Wright

**Public Health Directorate, Cambridgeshire County Council and Peterborough City Council, UK**

Emmeline Watkins, Elizabeth Wright, Linda Sheridan, Kathryn Faulkner, Vickie Braithwaite
