# Supplementary material for: Feasibility and efficacy of mass testing for SARS-CoV-2 in a UK university using swab pooling and PCR
Source: Research Square preprint supplement (doi:10.21203/rs.3.rs-520626/v1), 2021-05-20

Fig. 1: Study cohort.

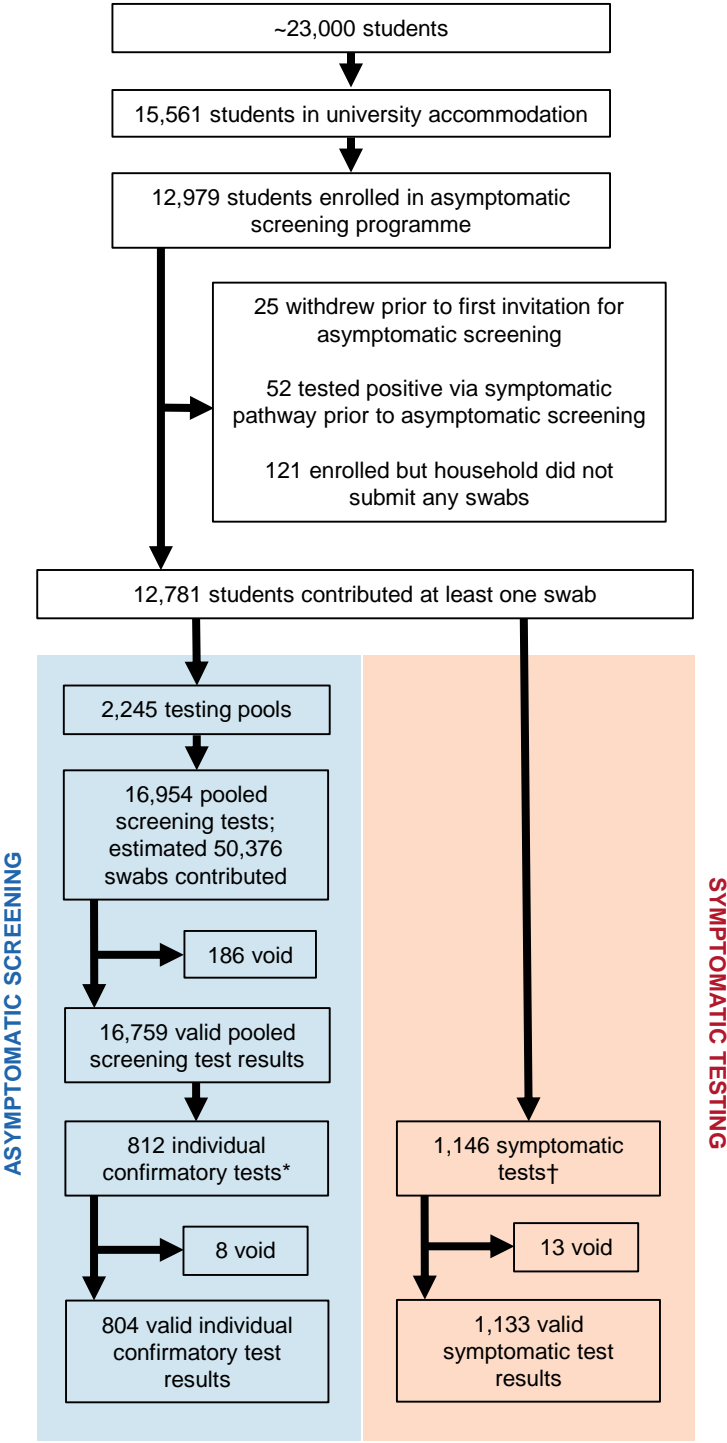

Fig. 2: Schematic overview of asymptomatic screening programme.

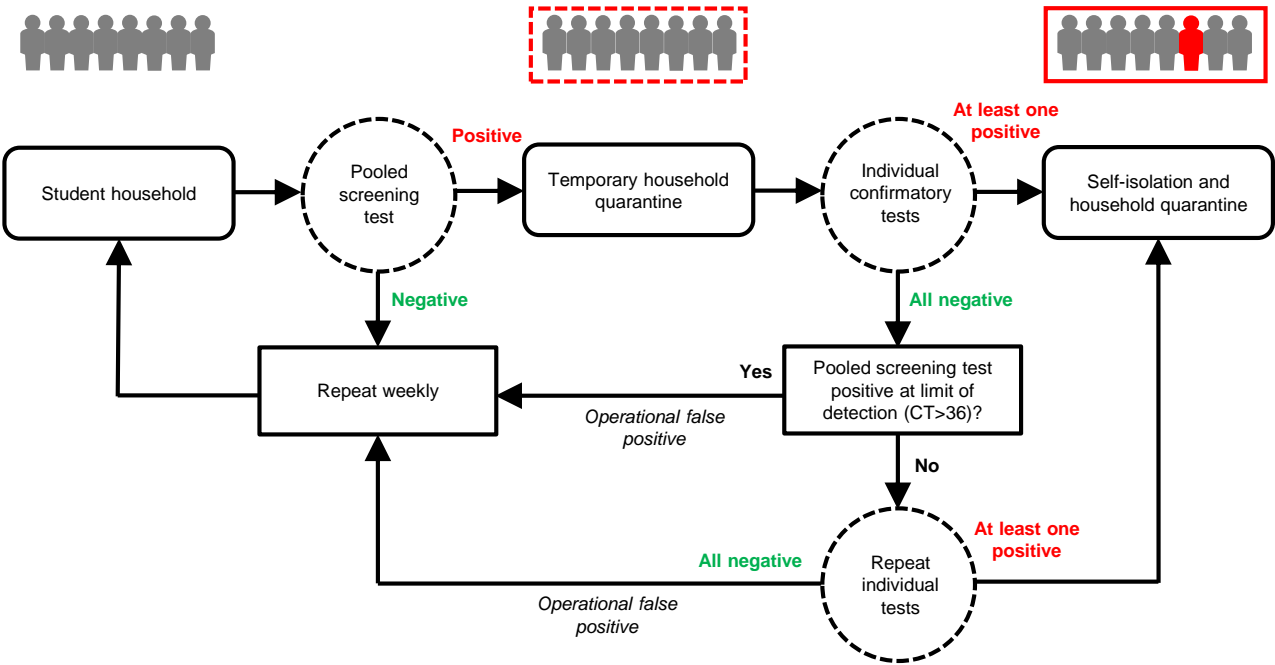

Fig. 3: Student participation and implementation of swab pooling.

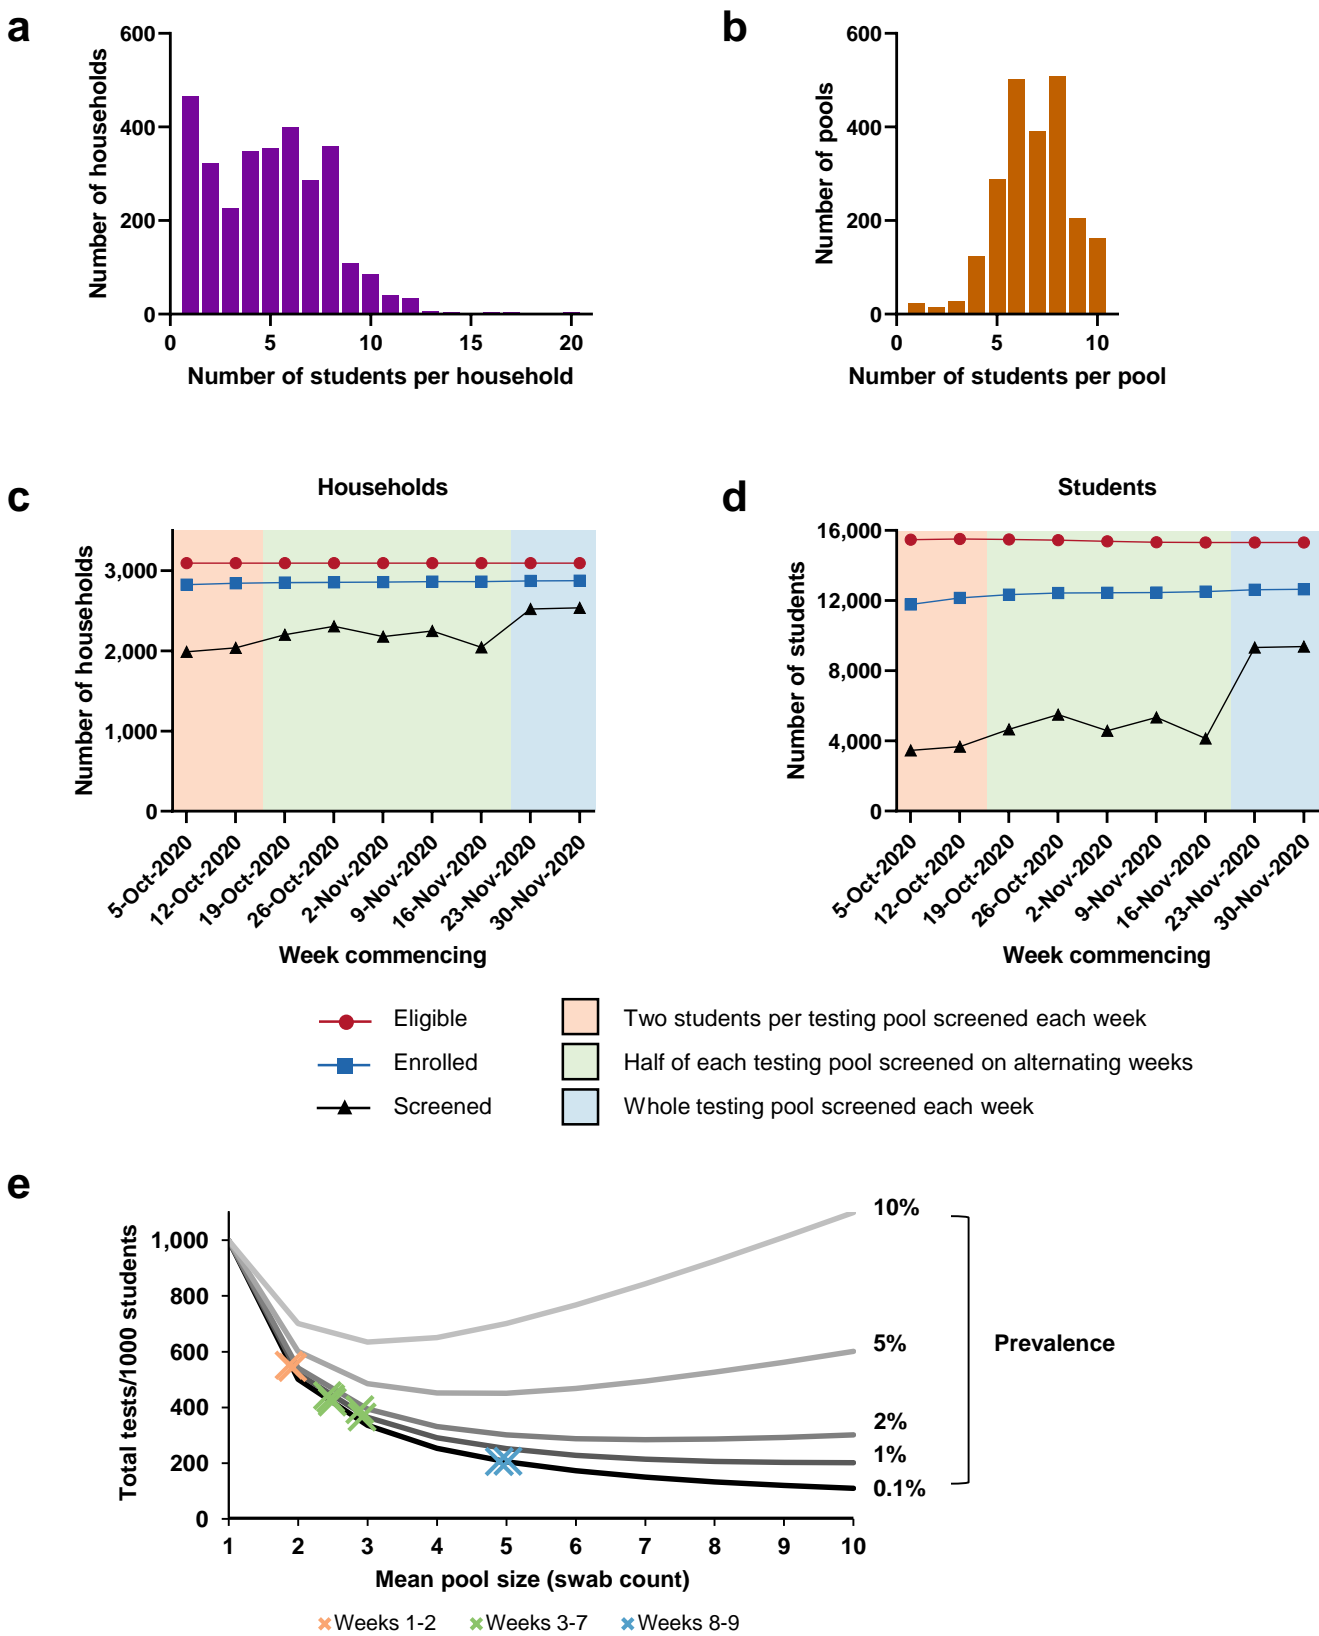

Fig. 4: Clinical validation of swab pooling.

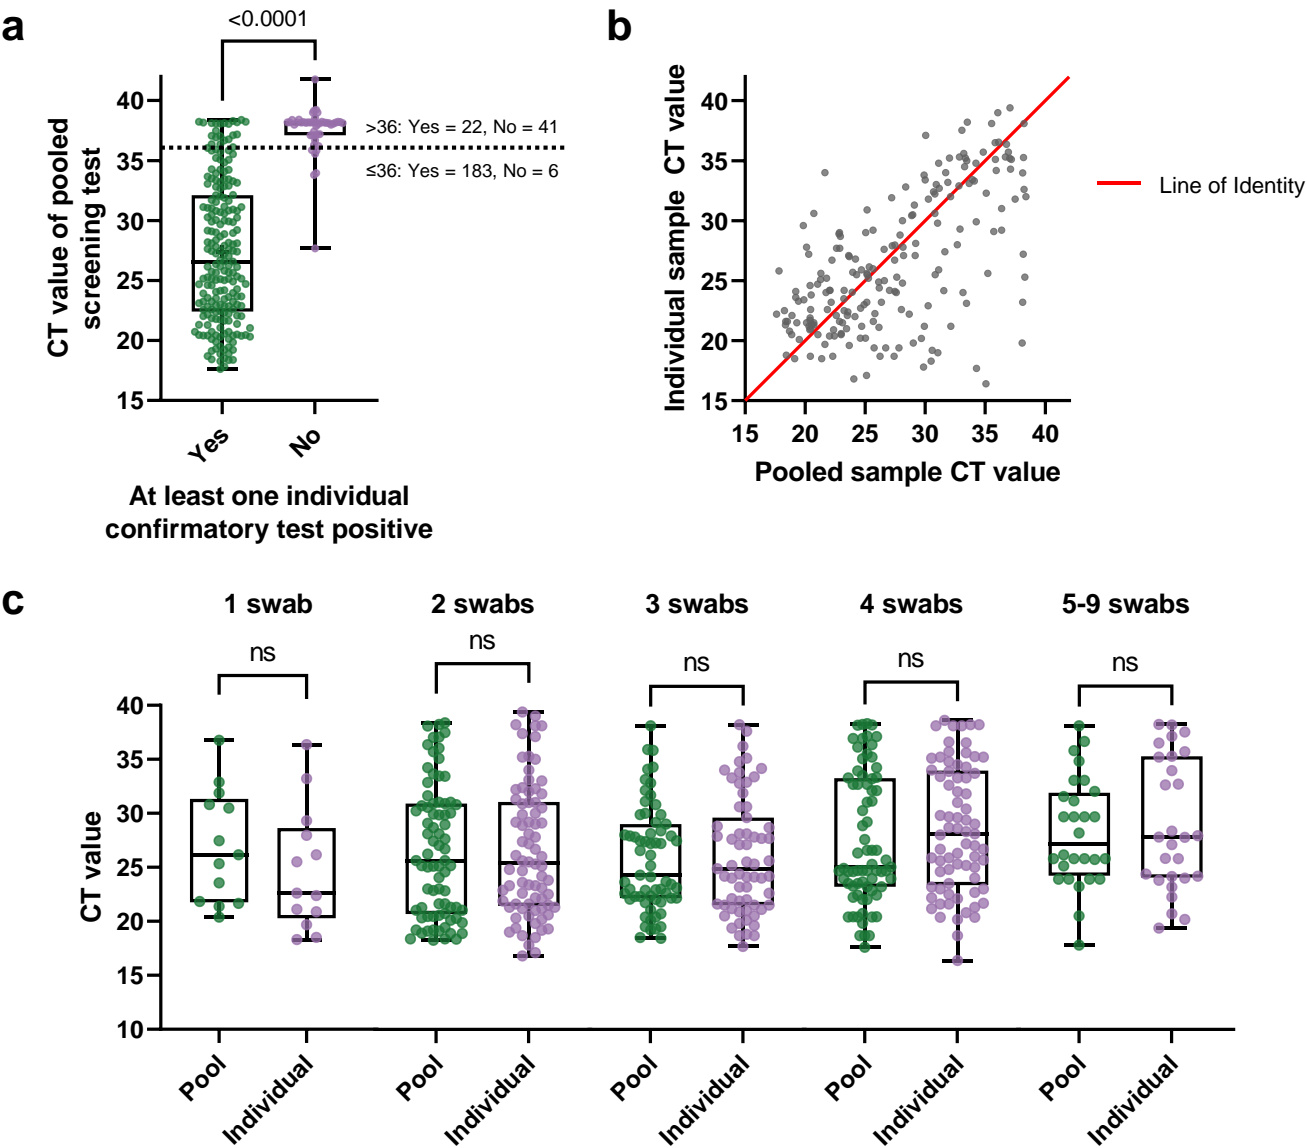

**Fig. 5. Case ascertainment by asymptomatic screening and symptomatic testing.**

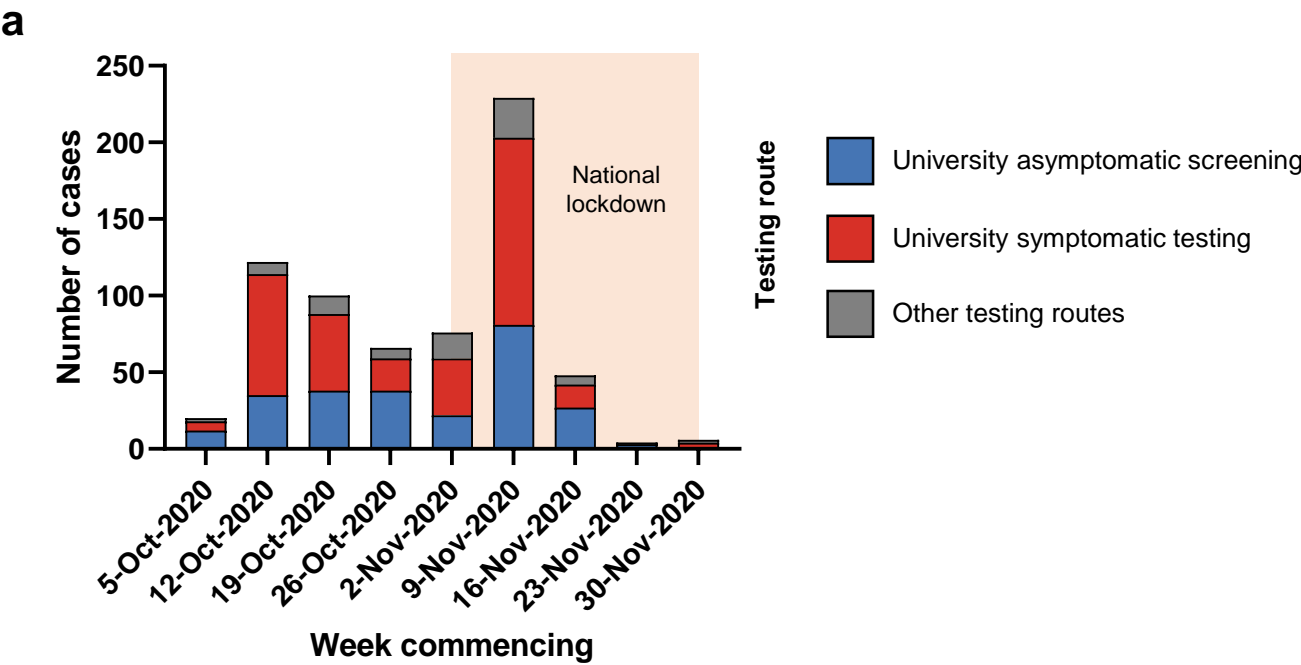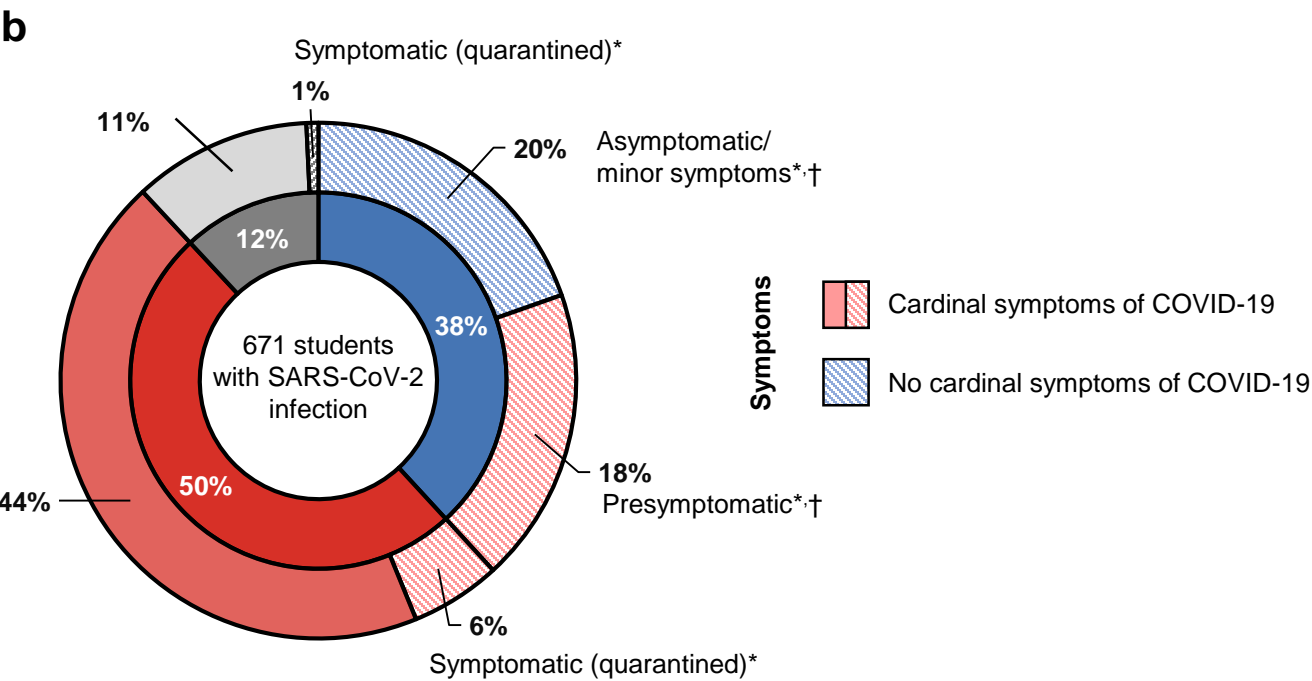

Fig. 6. Efficacy of asymptomatic screening.

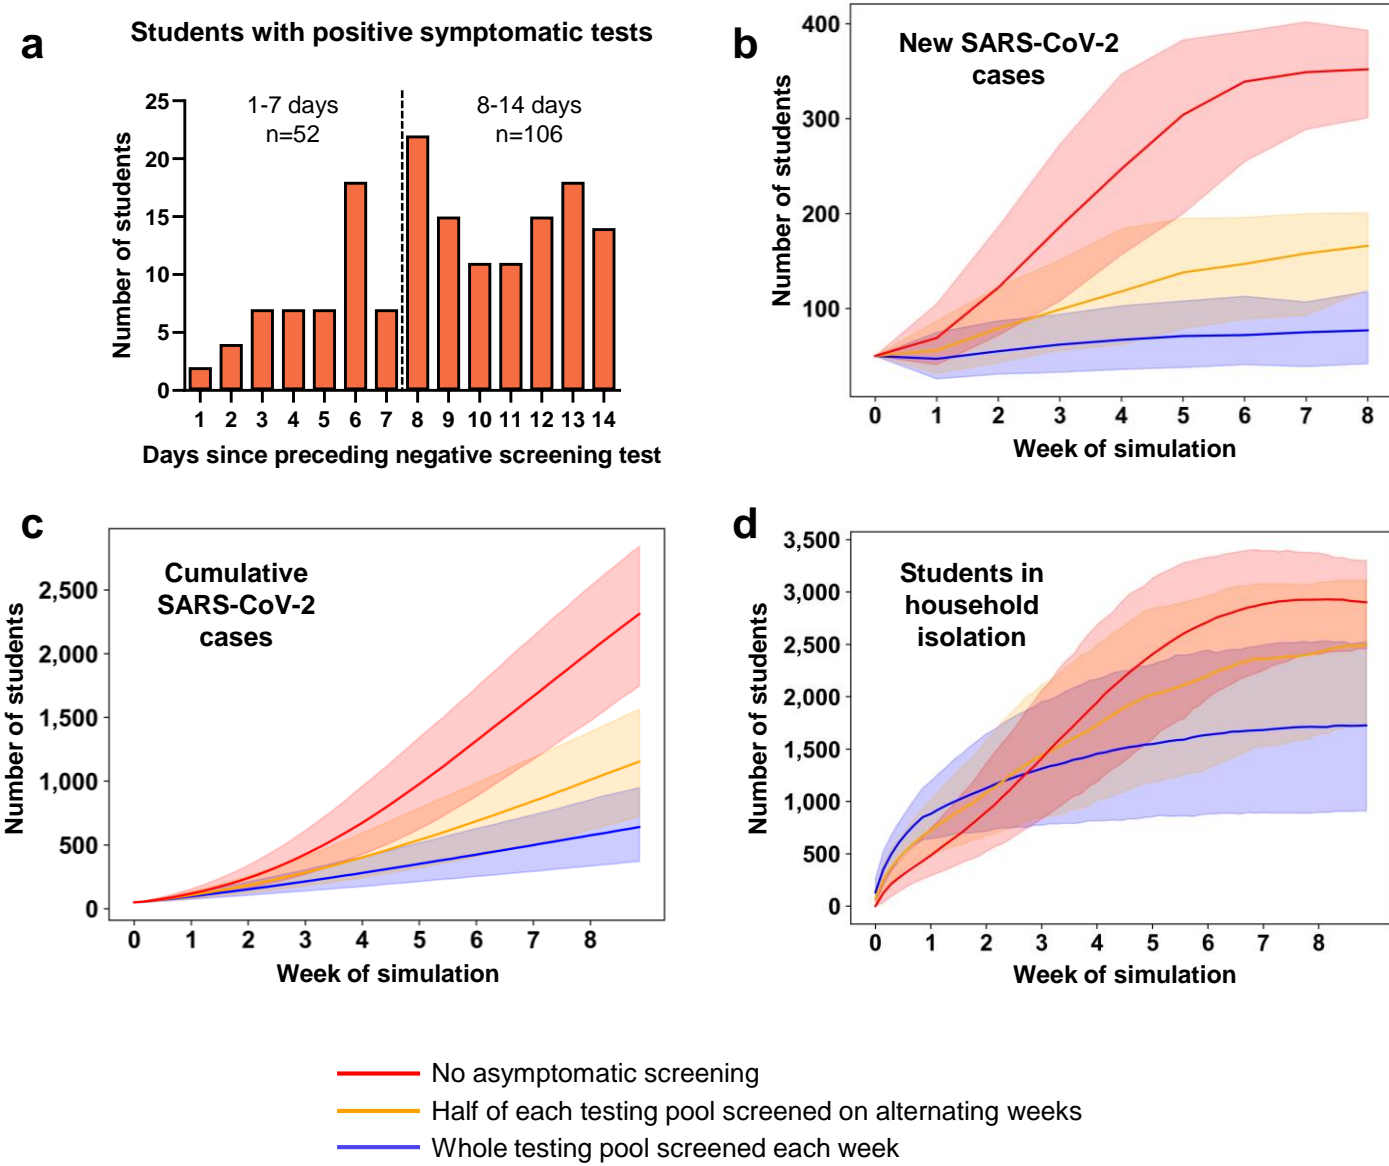

Supplement: Supplementary file 3 [file ebf71fa34d0b59889277ad25.pdf]
